# Supplementary material
Source: publisher site journal article supplement (https://jamanetwork.com/journals/NEUR/articlepdf/1815002/noi130094supp1_prod.pdf)
Supplement: Supplementary file 1 [file noi130094supp1_prod.pdf]

## Supplementary Online Content

Ascherio A, Munger KL, White R, et al. Vitamin D as an early predictor of multiple sclerosis activity and progression. *JAMA Neurol*. Published online January 20, 2014. doi:10.1001/jamaneurol.2013.5993.

**eTable 1.** BENEFIT Participants According to Changes in EDSS Scores Between Baseline and 6 Months

**eTable 2.** Selected Characteristics of Patients in BENEFIT With 25(OH)D Measurements at Months 6 and 12 by Level of the Average of Season-Adjusted 25(OH)D at Baseline, 6 Months, and 12 Months

**eTable 3.** HRs for Conversion to MDMS and CDMS for 50-nmol/L (20-ng/mL) increase in 25(OH)D

**eTable 4.** MS Activity and Vitamin D by Treatment Group: RRs for New Active MRI Lesions and MS Relapses According to a 50-nmol/L (20-ng/mL) Increment in Serum 25(OH)D Levels

**eTable 5.** Disease Progression and Vitamin D Levels by Treatment Group: Relative Annual Change Percentage in T2 Lesion Volume and Brain Volume as well as Change of EDSS With 95% Confidence Intervals for a 50-nmol/L (20-ng/mL) Increment in Serum 25(OH)D

**eFigure 1.** Unadjusted Serum 25(OH)D Levels by Visit

**eFigure 2.** Unadjusted and Adjusted 25(OH)D Levels by Season

**eFigure 3.** Hazard Ratios for Conversion to MDMS (A) or CDMS (B) by Quintiles of Serum 25(OH)D

**eFigure 4.** Rate Ratio of Relapses up to Year 5 by Quintiles of Serum 25(OH)D

**eFigure 5.** Percentage Change of Brain Volume From Year 1 to Year 5 by Quintiles of Serum 25(OH)D

This supplementary material has been provided by the authors to give readers additional information about their work.

**eTable 1. BENEFIT Participants According to Changes in EDSS Scores Between Baseline and 6 Months**

| EDSS at Baseline | EDSS at 6 months |           |          |          |          |          | Subtotal  |
|------------------|------------------|-----------|----------|----------|----------|----------|-----------|
|                  | ≤1.5             | 2.0       | 2.5      | 3.0      | 3.5      | 4.0+     |           |
|                  | N (%)            |           |          |          |          |          |           |
| ≤1.5             | 227 (85.0)       | 31 (11.6) | 5 (1.9)  | 1 (0.4)  | 2 (0.7)  | 1 (0.4)  | 267 (100) |
| 2.0              | 59 (52.7)        | 40 (35.7) | 9 (8.0)  | 2 (1.8)  | 1 (0.9)  | 1 (0.9)  | 112 (100) |
| 2.5              | 13 (37.1)        | 7 (20.0)  | 8 (22.9) | 4 (11.4) | 2 (5.7)  | 1 (2.9)  | 35 (100)  |
| 3.0              | 4 (21.1)         | 5 (26.3)  | 4 (21.1) | 3 (15.8) | 2 (10.5) | 1 (5.3)  | 19 (100)  |
| 3.5              | 1 (10.0)         | 2 (20.0)  | 1 (10.0) | 1 (10.0) | 3 (30.0) | 2 (20.0) | 10 (100)  |
| 4.0+             | 0 (0.0)          | 0 (0.0)   | 1 (100)  | 0 (0.0)  | 0 (0.0)  | 0 (0.0)  | 1 (100)   |

Abbreviation: EDSS, Expanded Disability Status Scale.

**eTable 2. Selected Characteristics of Patients in BENEFIT With 25(OH)D Measurements at Months 6 and 12 by Level of the Average of Season-Adjusted 25(OH)D at Baseline, 6 Months, and 12 Months**

|                                                  | Quintiles of 25(OH)D      |                           |                           |                           |                           | Low vs. high 25(OH)D      |                           |
|--------------------------------------------------|---------------------------|---------------------------|---------------------------|---------------------------|---------------------------|---------------------------|---------------------------|
|                                                  | 1                         | 2                         | 3                         | 4                         | 5                         | Low (<50 nmol/L)          | High (≥50 nmol/L)         |
| N patients <sup>a</sup>                          | 60                        | 74                        | 71                        | 60                        | 69                        | 183                       | 151                       |
| 25(OH)D, nmol/L                                  |                           |                           |                           |                           |                           |                           |                           |
| range                                            | 22-36                     | 36-45                     | 45-52                     | 53-61                     | 62-98                     | 22-50                     | 50-98                     |
| median                                           | 31                        | 40                        | 49                        | 56                        | 70                        | 40                        | 60                        |
| Age at recruitment, mean (SD)                    | 31.5 (7.9)                | 33.5 (6.9)                | 29.0 (7.1)                | 30.4 (7.0)                | 30.8 (7.5)                | 31.9 (7.4)                | 30.0 (7.3)                |
| Female, %                                        | 65.0                      | 74.3                      | 66.2                      | 71.7                      | 73.9                      | 69.9                      | 70.9                      |
| Randomized to IFNB-1b, %                         | 66.7                      | 60.8                      | 59.2                      | 65.0                      | 72.5                      | 60.1                      | 70.2                      |
| Monofocal onset, %                               | 48.3                      | 51.4                      | 45.1                      | 45.0                      | 56.5                      | 47.5                      | 51.7                      |
| Number of T2 lesions at baseline, median (Q1–Q3) | 29.5<br>(11.8–38.0)       | 18.0<br>(8.3–47.0)        | 14.0<br>(7.5–31.0)        | 15.5<br>(7.0–44.3)        | 16.0<br>(6.0–40.0)        | 20<br>(9.0–38.5)          | 15<br>(7.0–37.0)          |
| T2 volume at baseline, median (Q1–Q3)            | 2596<br>(1101.8–5471.8)   | 1947<br>(743.3–5310.8)    | 1883<br>(705.5–3411.5)    | 1947<br>(593.0–4454.0)    | 1714<br>(521.0–5215.0)    | 2141<br>(741.0–4891.0)    | 1851<br>(621.0–4694.5)    |
| Central brain volume at baseline, median (Q1–Q3) | 1053.3<br>(1020.2–1089.6) | 1040.5<br>(1015.9–1070.9) | 1056.9<br>(1022.2–1083.8) | 1060.2<br>(1029.4–1082.7) | 1073.3<br>(1029.9–1094.6) | 1053.0<br>(1018.3–1074.2) | 1066.5<br>(1030.6–1088.8) |
| BMI, mean (SD)                                   | 25.7 (5.6)                | 23.9 (4.1)                | 24.2 (3.7)                | 23.6 (3.6)                | 23.1 (3.8)                | 24.6 (4.7)                | 23.4 (3.7)                |
| Steroids for 1st clinical event, %               | 75.0                      | 60.8                      | 70.4                      | 73.3                      | 56.5                      | 67.8                      | 65.6                      |
| Time to last EDSS, mean (days)                   | 1780.2                    | 1757.7                    | 1762.6                    | 1796.4                    | 1791.1                    | 1768.3                    | 1786.7                    |
| Time to last MRI, mean (days)                    | 1744.2                    | 1704.7                    | 1714.7                    | 1745.5                    | 1753.5                    | 1722.2                    | 1742.4                    |

<sup>a</sup>N=334 patients with 25(OH)D measurements at both 6 and 12 months. To convert 25(OH)D to ng/mL divide by 2.5.

**eTable 3. HRs for Conversion to MDMS and CDMS for 50-nmol/L (20-ng/mL) increase in 25(OH)D**

| Period of follow-up             | Group           | MDMS |                  |         | CDMS |                  |         |
|---------------------------------|-----------------|------|------------------|---------|------|------------------|---------|
|                                 |                 | N    | HR (95% CI)      | p-value | N    | HR (95% CI)      | p-value |
| Baseline –60M                   | All             | 465  | 0.74 (0.53-1.02) | 0.065   | 465  | 0.76 (0.49-1.19) | 0.23    |
|                                 | Initial IFNb    | 290  | 0.70 (0.46-1.05) | 0.087   | 290  | 0.90 (0.51-1.56) | 0.70    |
|                                 | Initial Placebo | 175  | 0.80 (0.47-1.36) | 0.41    | 175  | 0.57 (0.27-1.20) | 0.14    |
| 6M-60M                          | All             | 259  | 0.51 (0.31-0.84) | 0.008   | 386  | 0.67 (0.39-1.17) | 0.16    |
|                                 | Initial IFNb    | 182  | 0.55 (0.31-0.99) | 0.04    | 247  | 0.72 (0.37-1.42) | 0.34    |
|                                 | Initial Placebo | 77   | 0.40 (0.14-1.15) | 0.088   | 139  | 0.59 (0.22-1.57) | 0.29    |
| 6M-60M<br>Both 6M & 12M 25(OH)D | All             | 202  | 0.44 (0.25-0.77) | 0.003   | 302  | 0.48 (0.25-0.91) | 0.025   |
|                                 | Initial IFNb    | 146  | 0.43 (0.22-0.84) | 0.01    | 200  | 0.48 (0.22-1.04) | 0.06    |
|                                 | Initial Placebo | 56   | 0.48 (0.15-1.57) | 0.23    | 102  | 0.49 (0.15-1.63) | 0.24    |

Abbreviations: CDMS, clinically definite MS; HR, hazard ratios; MDMS, McDonald et al multiple sclerosis criteria. Adjusted for age, treatment group (except in stratified analyses) sex, T2scr, and type of onset.

**eTable 4. MS Activity and Vitamin D by Treatment Group: RRs for New Active MRI Lesions and MS Relapses According to a 50-nmol/L (20-ng/mL) Increment in Serum 25(OH)D Levels**

| Patients           | Period          | All patients                        |       | Excluding missing 6 or 12 M 25(OH)D |        |                                     |       |                                     |       |
|--------------------|-----------------|-------------------------------------|-------|-------------------------------------|--------|-------------------------------------|-------|-------------------------------------|-------|
|                    |                 | Baseline to 60 M                    |       | Baseline to 60 M                    |        | 12M to 60 M                         |       | 24M to 60 M                         |       |
| 25(OH)D            |                 | Cumulative average -Updated to 24 M |       | Cumulative average -Updated to 24 M |        | Cumulative average – updated to 12M |       | Cumulative average – updated to 12M |       |
|                    |                 | RR (95% CI)                         | p     | RR (95% CI)                         | p      | RR (95% CI)                         | p     | RR (95% CI)                         | p     |
| New active lesions | Initial IFNb    | .45 (.29-.69)                       | .0003 | .35 (.21-.58)                       | .00004 | .31 (.15-.61)                       | .0008 | .27 (.13-.57)                       | .0007 |
|                    | Initial Placebo | .69 (.44-1.09)                      | .12   | .77 (.45-1.32)                      | .35    | .61 (.30-1.27)                      | .19   | .49 (.22-1.11)                      | .09   |
| Relapses           | Initial IFNb    | .99 (.53-1.95)                      | .97   | .89 (.42-1.87)                      | .75    | .38 (.14-.99)                       | .048  | .41 (.14-1.19)                      | .099  |
|                    | Initial Placebo | .48 (.24-.97)                       | .04   | .45 (.18-1.10)                      | .08    | .59 (.18-1.96)                      | .39   | .46 (.07-1.84)                      | .40   |

Abbreviations: MRI, magnetic resonance imaging; MS, multiple sclerosis; RR, rate ratio.  
RR adjusted for age, sex, treatment, time of follow-up, and T2 lesion score at baseline.

**eTable 5. Disease Progression and Vitamin D Levels by Treatment Group: Relative Annual Change Percentage in T2 Lesion Volume and Brain Volume as well as Change of EDSS With 95% Confidence Intervals for a 50-nmol/L (20-ng/mL) Increment in Serum 25(OH)D**

| Patients     | Group           | All                                 |       | Excluding missing 6M or 12 M 25(OH)D |       |                                     |       |
|--------------|-----------------|-------------------------------------|-------|--------------------------------------|-------|-------------------------------------|-------|
|              |                 | 12M to 60 M                         |       | 12M to 60 M                          |       | 24M to 60 M                         |       |
| 25(OH)D      |                 | Cumulative average -Updated to 24 M |       | Cumulative average – updated to 12M  |       | Cumulative average – updated to 12M |       |
|              |                 | % change (95% CI)                   | p     | % change (95% CI)                    | p     | % change (95% CI)                   | p     |
| T2 volume    | Initial IFNb    | -21 (-32 to -10)                    | .0007 | -26 (-39 to -12)                     | .0007 | -30 (-43 to -15)                    | .0004 |
|              | Initial Placebo | -19 (-31 to -7)                     | .004  | -25 (-38 to -8)                      | .005  | -26 (-40 to -8)                     | .006  |
| Brain volume | Initial IFNb    | .40 (-.05 to .86)                   | .08   | .64 (.08 to 1.2)                     | .02   | .68 (.02 to 1.35)                   | .04   |
|              | Initial Placebo | .11 (-.42 to .64)                   | .69   | .04 (-.69 to .79)                    | .9    | .16 (-.66 to .99)                   | .7    |
| Patients     |                 | All                                 |       | Excluding missing 6M or 12 M 25(OH)D |       |                                     |       |
| Period       |                 | 6M to 60 M                          |       | 6M to 60 M                           |       | 24M to 60 M                         |       |
| 25(OH)D      |                 | Cumulative average -Updated to 24 M |       | Cumulative average – updated to 12M  |       | Cumulative average – updated to 12M |       |
|              |                 | change (95% CI)                     | p     | change (95% CI)                      | p     | change (95% CI)                     | p     |
| EDSS         | Initial IFNb    | -.07 (-.32 to .18)                  | .59   | -.03 (-.37 to .30)                   | .86   | -.04 (-.41 to .33)                  | .84   |
|              | Initial Placebo | -.25 (-.59 to .08)                  | .14   | -.39 (-.85 to .07)                   | .09   | -.42 (-.91 to .07)                  | .09   |

Abbreviation: EDSS, Expanded Disability Status Scale.

Results adjusted for age, sex, treatment, time of follow-up, and T2 lesion score at baseline.

- **eFigure 1.** Unadjusted Serum 25(OH)D Levels by Visit
- **eFigure 2.** Unadjusted and Adjusted 25(OH)D Levels by Season. To convert to ng/mL divide by 2.5
- **eFigure 3.** Hazard Ratios for Conversion to MDMS (A) or CDMS (B) by Quintiles of Serum 25(OH)D. Period of follow-up is from 6 to 60 months. Analyses are based on patients with Month 6 and Month 12 measurements of 25(OH)D. Group comparisons are adjusted for age, sex, treatment, time of follow-up, and T2 lesion score at baseline. To convert nmol/L of 25(OH)D to ng/mL divide by 2.5. Error bars are 95% confidence intervals; the lowest quintile is used as reference. A) \*p=0.042 for q4, p=0.045 for q5.
- **eFigure 4.** Rate Ratio of Relapses up to Year 5 by Quintiles of Serum 25(OH)D. Analyses are based on patients with Month 6 and Month 12 measurements of 25(OH)D. Group comparisons are adjusted for age, sex, treatment, time of follow-up, and T2 lesion score at baseline. To convert nmol/L of 25(OH)D to ng/mL divide by 2.5. Error bars are 95% confidence intervals; the lowest quintile is used as reference.
- **eFigure 5.** Percentage Change of Brain Volume From Year 1 to Year 5 by Quintiles of Serum 25(OH)D. Analyses are based on patients with Month 6 and Month 12 measurements of 25(OH)D. Group comparisons are adjusted for age, sex, treatment, time of follow-up, and T2 lesion score at baseline. To convert nmol/L of 25(OH)D to ng/mL divide by 2.5. Error bars are 95% confidence intervals; the lowest quintile is used as reference. A) \*Compared with q1: p=0.004 for 2; p=0.03 for q3. Compared with q2: p=0.01 for q4; p=0.0002 for q5; compared with q3: p=0.03 for q4; p=0.001 for q5.

**eFigure 1.** Unadjusted Serum 25(OH)D Levels by Visit

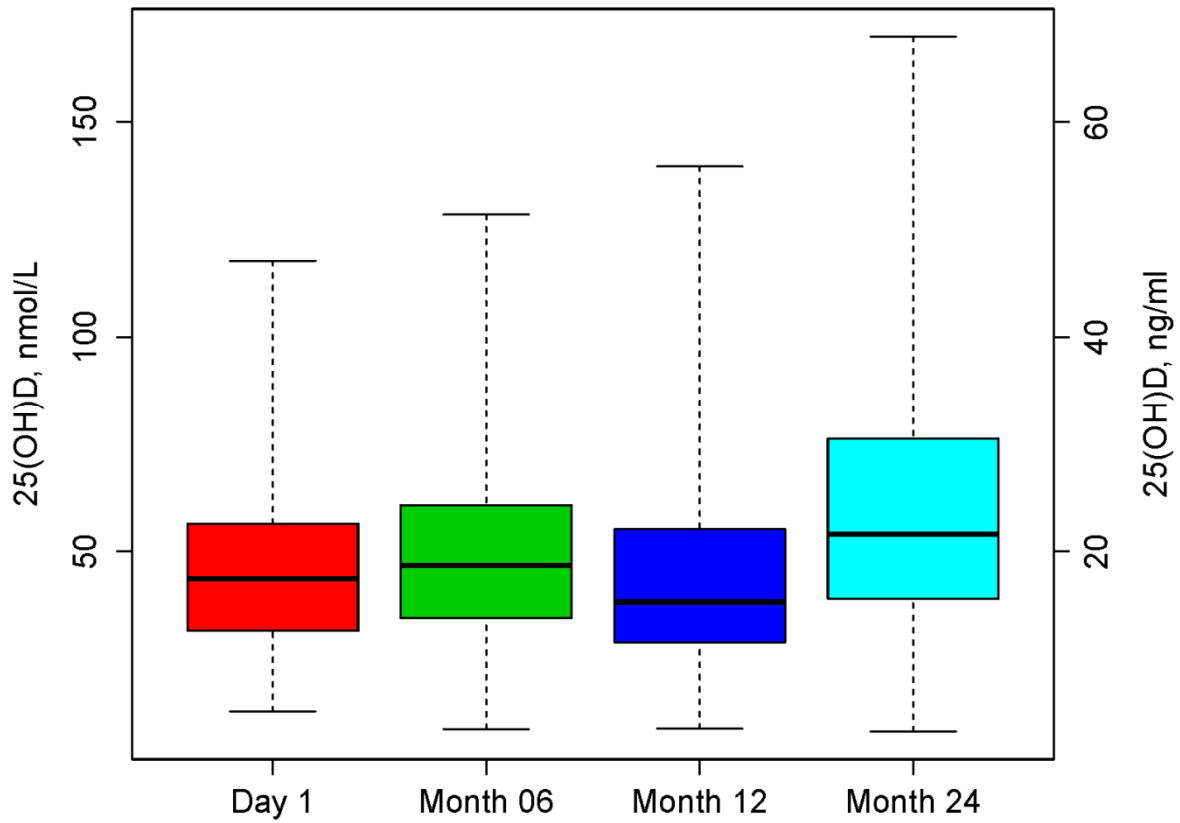

Serum 25(OH)D levels by visit in nmol/L (to convert to ng/mL divide by 2.5).



**eFigure 2.** Unadjusted and Adjusted 25(OH)D Levels by Season

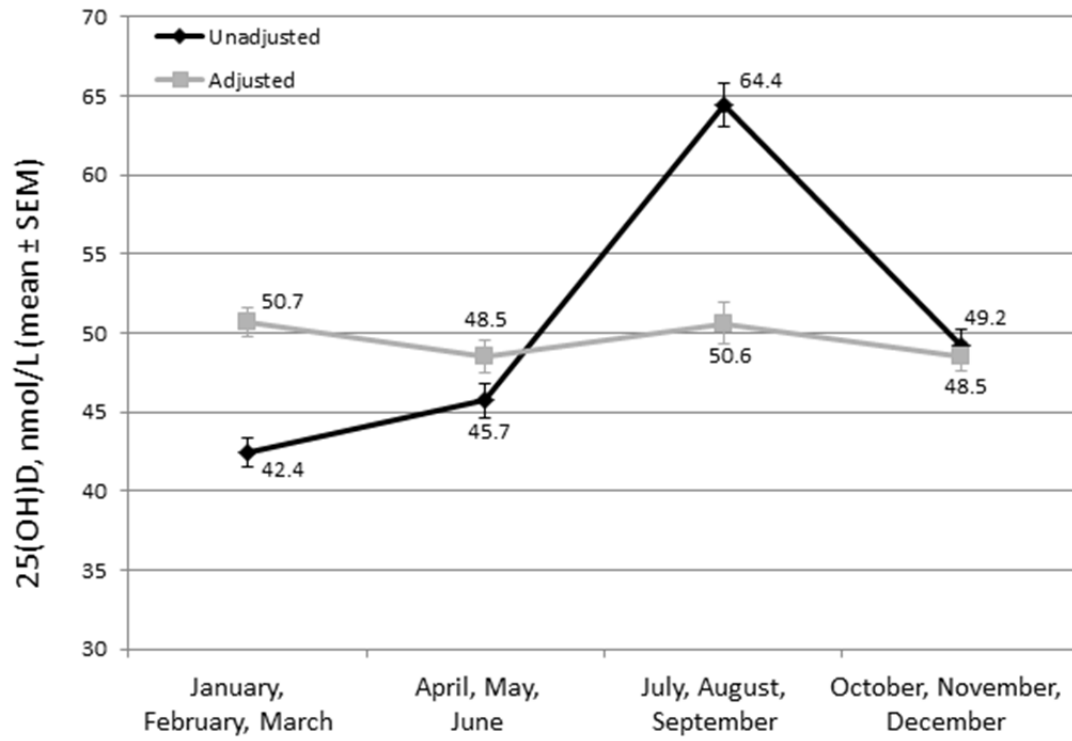

To convert to ng/mL divide by 2.5

**eFigure e3.** Hazard Ratios for Conversion to MDMS (A) or CDMS (B) by Quintiles of Serum 25(OH)D

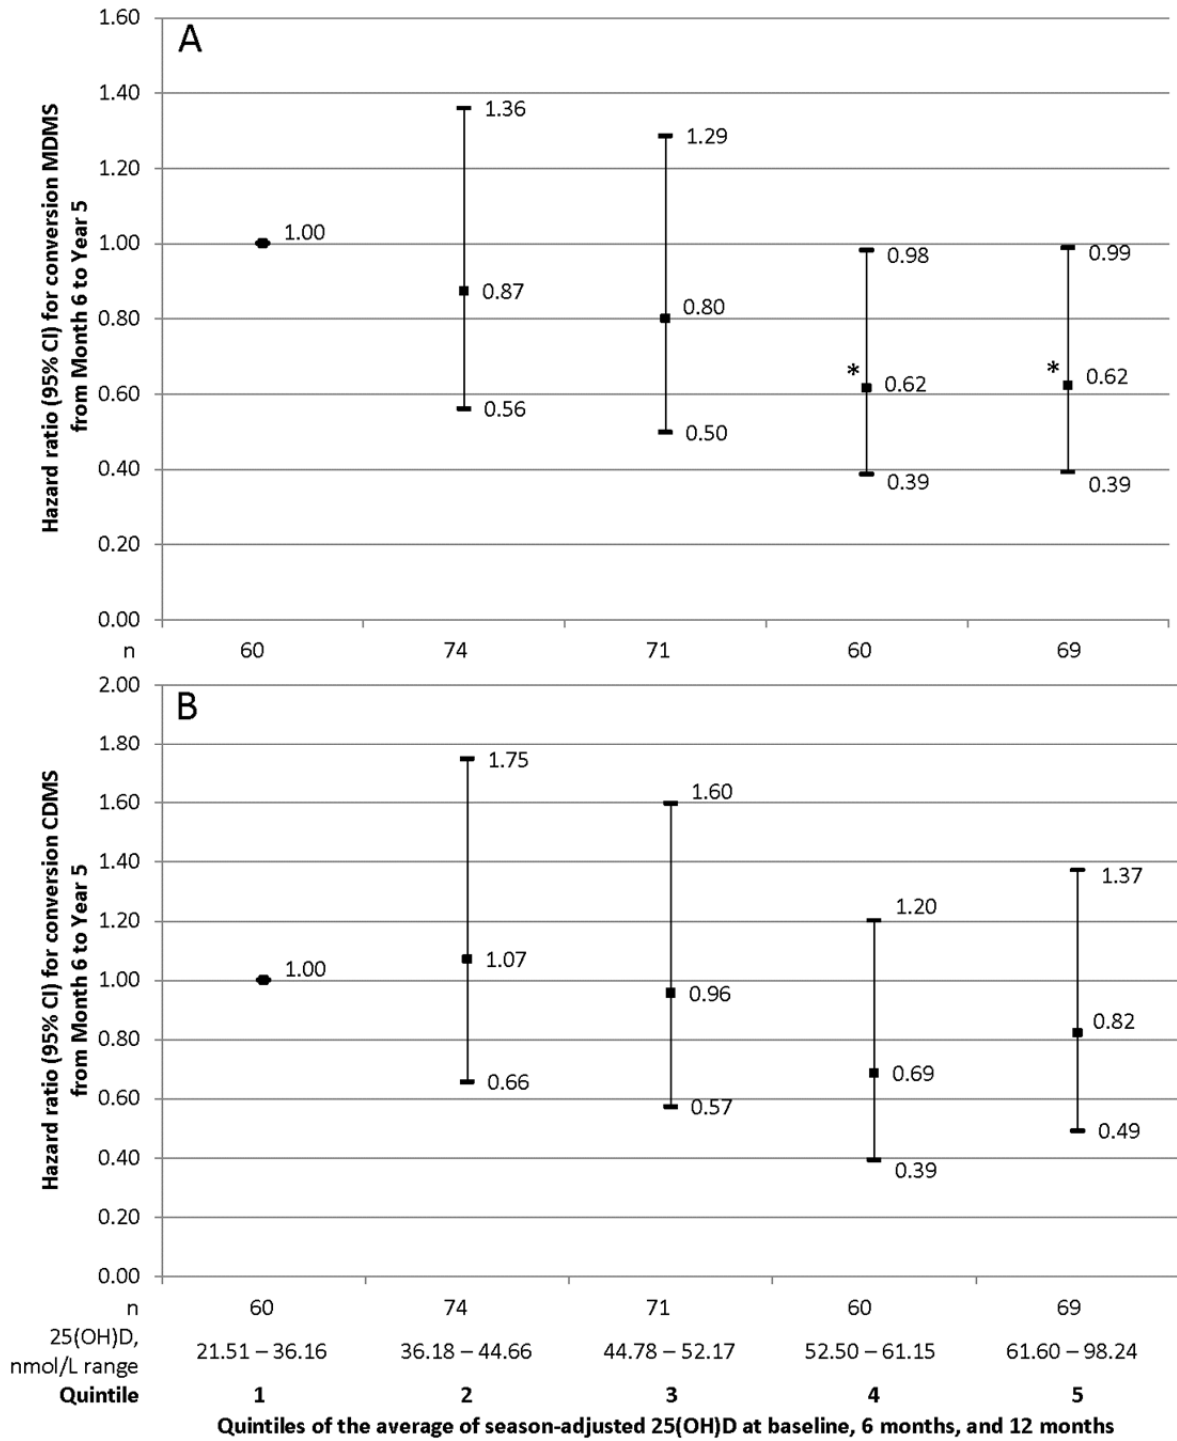

Period of follow-up is from 6 to 60 months. Analyses are based on patients with Month 6 and Month 12 measurements of 25(OH)D. Group comparisons are adjusted for age, sex, treatment, time of follow-up, and T2 lesion score at baseline. To convert nmol/L of 25(OH)D to ng/mL divide by 2.5. Error bars are 95% confidence intervals; the lowest quintile is used as reference. A) \*p=0.042 for q4, p=0.045 for q5.

**eFigure 4.** Rate Ratio of Relapses up to Year 5 by Quintiles of Serum 25(OH)D

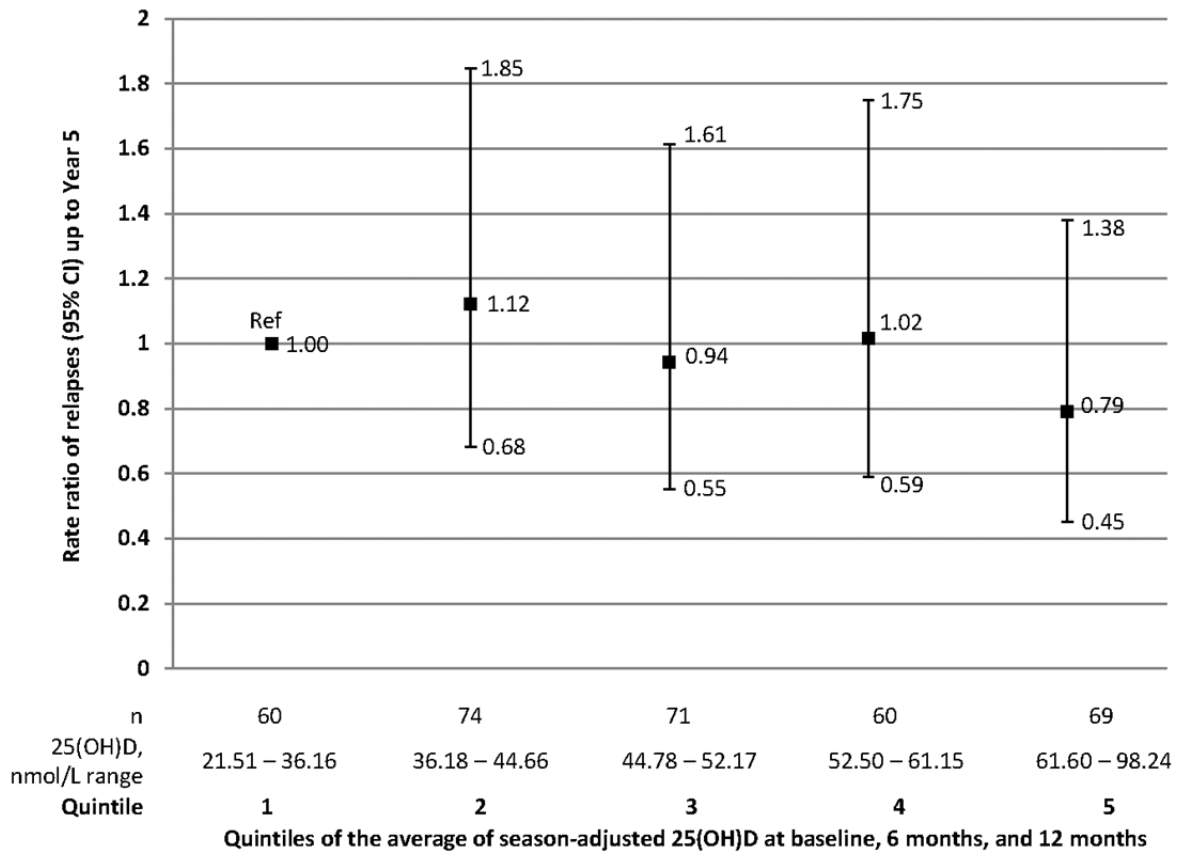

Analyses are based on patients with Month 6 and Month 12 measurements of 25(OH)D. Group comparisons are adjusted for age, sex, treatment, time of follow-up, and T2 lesion score at baseline. To convert nmol/L of 25(OH)D to ng/mL divide by 2.5. Error bars are 95% confidence intervals; the lowest quintile is used as reference.

**eFigure 5.** Percentage Change of Brain Volume From Year 1 to Year 5 by Quintiles of Serum 25(OH)D

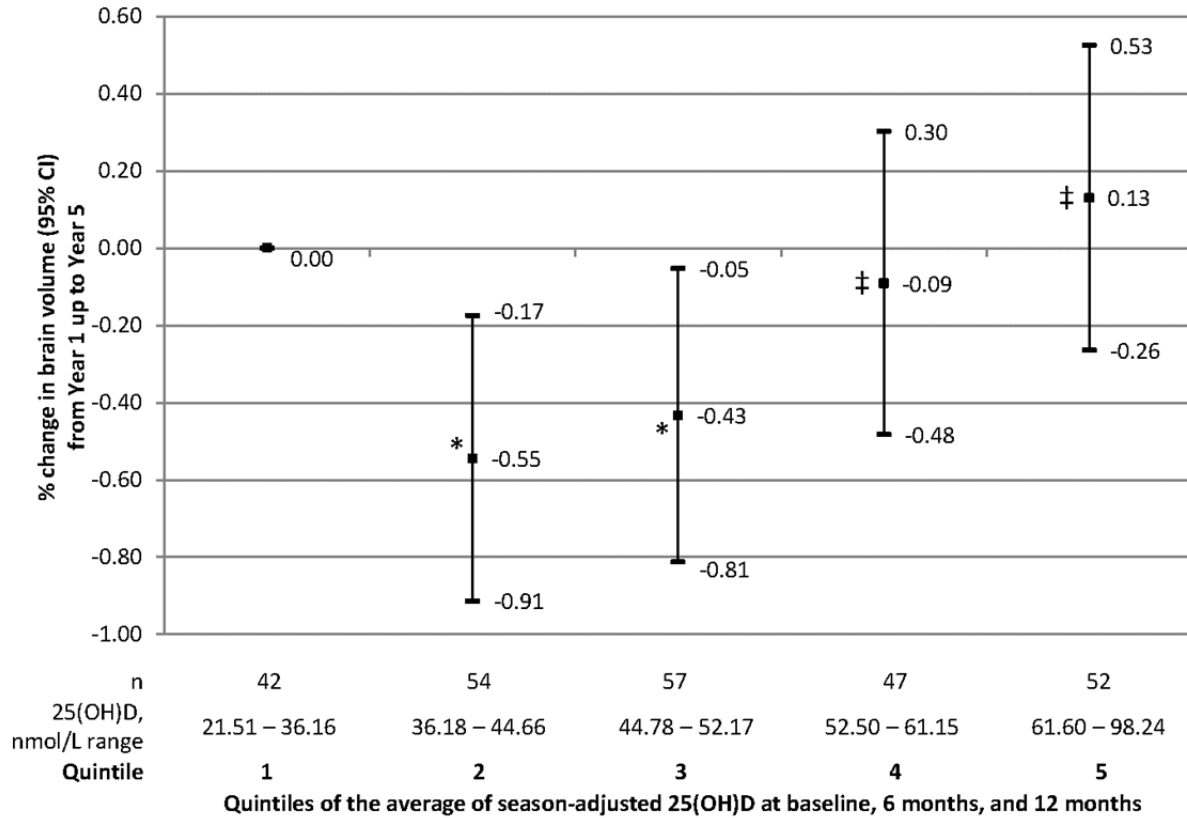

Analyses are based on patients with Month 6 and Month 12 measurements of 25(OH)D. Group comparisons are adjusted for age, sex, treatment, time of follow-up, and T2 lesion score at baseline. To convert nmol/L of 25(OH)D to ng/mL divide by 2.5. Error bars are 95% confidence intervals; the lowest quintile is used as reference. A) \*Compared with q1: p=0.004 for 2; p=0.03 for q3. Compared with q2: p=0.01 for q4; p=0.0002 for q5; compared with q3: p=0.03 for q4; p=0.001 for q5.
